# Supplementary material
Source: ML conference proceedings conference paper supplement (https://openaccess.thecvf.com/content/ICCV2025/html/Yan_Derm1M_A_Million-scale_ICCV_2025_paper.html)
Supplement: Supplementary file 1 [file Yan_Derm1M_A_Million-scale_ICCV_2025_supplemental.pdf]

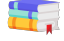

# Derm1M: A Million-scale Vision-Language Dataset Aligned with Clinical Ontology Knowledge for Dermatology

## –Supplemental Material–

Siyuan Yan<sup>1\*</sup> Ming Hu<sup>1\*</sup> Yiwen Jiang<sup>1\*</sup> Xieji Li<sup>1</sup>

Hao Fei<sup>2</sup> Philipp Tschandl<sup>3</sup> Harald Kittler<sup>3</sup> Zongyuan Ge<sup>1</sup>(✉)

<sup>1</sup> Monash University <sup>2</sup> National University of Singapore <sup>3</sup> Medical University of Vienna

{siyuan.yan, zongyuan.ge}@monash.edu

### Abstract

*In this supplementary material, we present the following contents: (1) more detailed data curation pipelines. (2) additional dataset statistics. (3) downstream dataset details. (4) additional ablation studies, and (5) additional implementation details.*

## 1. More Detailed Data Curation Pipelines

### 1.1. YouTube Video

The main curation pipeline for YouTube is illustrated in Fig. 1 and Fig. 2 and detailed below.

**Collecting Representative Channels and Videos.** We constructed a comprehensive list of over 355 dermatology-related terms by consulting relevant literature and publicly available datasets. These terms encompass skin disease-related concepts, common names for various skin conditions, and associated synonyms. For each keyword, we retrieved the top 200 recommended videos from search queries. Additionally, based on our empirical observation that channel-based searches yield more focused and higher-quality explanatory videos compared to keyword searches, we manually curated 50 YouTube channels dedicated to dermatology explanations and downloaded their videos. During the downloading process, we prioritized the highest-resolution version of each video while filtering out videos shorter than 30 seconds or with a resolution below 224p. In total, we collected approximately 51k videos.

**Filtering for Narrative-Style Videos.** We assessed each video to determine: (1) whether it contains a sufficient number of usable dermatological images, and (2) whether it qualifies as a narrated video with rich explanatory voiceovers.

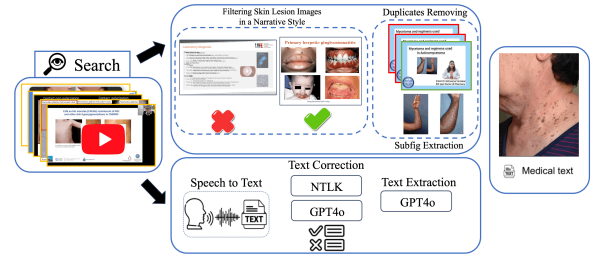

Figure 1. **Curation pipeline for YouTube content.** Our process begins with searching and collecting 51k videos from educational channels, followed by filtering to identify narrative-style content with high-quality explanations. We then extract and denoise text using a combination of speech-to-text models, handcrafted algorithms, and LLMs. Finally, we align the processed text with corresponding image pairs to create a curated dataset.

For criterion (1), we employed keyframe extraction with a predefined threshold to ensure a minimum level of visual change required for keyframe selection. For newly acquired videos, we extracted keyframes using FFmpeg by computing inter-frame color histogram differences. The threshold was determined via linear interpolation between 0.008 for 5-minute videos and 0.25 for 200-minute videos. We then trained and applied a DenseNet121 image classifier to identify keyframes containing dermatological images. Videos where more than 50% of keyframes were classified as containing dermatological content were labeled as valid.

For criterion (2), we utilized inaspeechsegmenter to estimate the proportion of human speech within each video, setting a threshold of 0.2. Videos falling below this threshold were marked as silent or lacking sufficient explanatory narration.

**Text Extraction and Denoising.** To address the challenges of automatic speech recognition (ASR) for medical terminology in YouTube subtitles [2], we employed the large-

\*Equal contribution

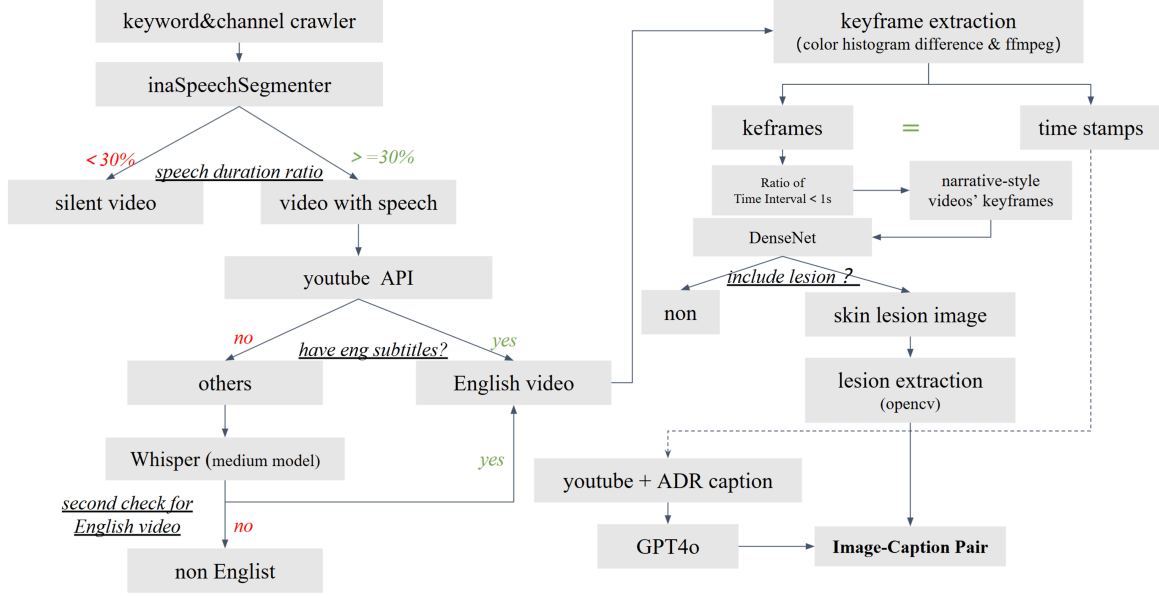

Figure 2. Flow chart of the curation pipeline for YouTube content.

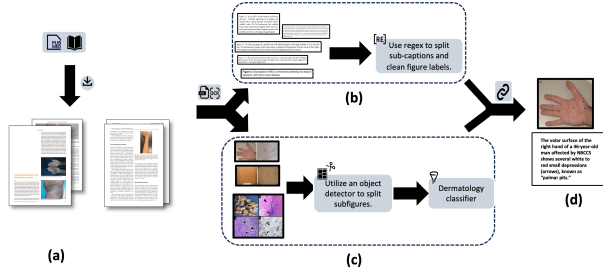

Figure 3. **Curation Pipeline for PubMed Source.** The process involves: (a) Searching and downloading articles from PubMed Open Access using pre-defined dermatology terms; (b) Extracting, splitting, and cleaning image captions; (c) Splitting subfigures using object detection and classifying skin images; and (d) Aligning image-text pairs to create the final dataset.

scale open-source Whisper Large-V3 model [6] to perform speech-to-text conversion by directly transcribing entire audio segments. We then developed a transcription denoising and quality control pipeline consisting of three key steps:

- (i) Applying the RAKE algorithm to identify key phrases (up to four words) and optimizing them by removing stop words using NLTK;
- (ii) Utilizing GPT-4o to verify and correct each entry, correcting transcription errors, and refining the alignment of complete descriptive statements;
- (iii) Prompting a language model to generate a structured summary of the subtitles for improved readability and organization.

**Aligning Image and Text Pairs.** To achieve precise align-

ment between images and their corresponding text, we defined the timestamp interval between consecutive keyframes as an image chunk and treated each transcribed sentence as a text chunk. When the temporal overlap between an image chunk and a text chunk exceeded 50%, we considered them a matched pair. Note that one image chunk may map to multiple text chunks, in which case we concatenated these text chunks into a single longer description.

For image chunks without any matching text chunks (i.e., those with zero temporal overlaps), we observed they typically depicted content similar to previous frames that already had mapped text (e.g., continuous discussion of the same type of lesion). Consequently, we aligned such unmatched chunks to the most recent preceding keyframe with an associated text description. To mitigate potential mismatches in fine-grained details, we additionally filtered out image-specific details from the textual content, preserving only high-level descriptive information.

## 1.2. PubMed

Following [3, 4], the main curation pipeline for PubMed OA is illustrated in Fig. 3 and detailed below.

**Collecting Image-text Pairs.** We retrieved dermatology-related articles published between 1990 and 2024 from the PMC Open Access Subset using 356 domain-specific terms. This query yielded 566,571 articles with approximately 3.6 million images. To filter out non-dermatology-related figures (e.g., diagrams, flow charts, cartoon illustrations, and X-rays), we implemented a combination of clustering and manual inspection. After filtering, we matched the selected images with their captions from the provided XML format

files to construct approximately 50K dermatology-focused image-text pairs.

**Filtering Process.** We used EfficientNetV2-S for feature extraction and applied PCA to reduce feature dimensions to 50. Using these features, we performed hierarchical K-means clustering, first grouping images into 20 major clusters, each further divided into 20 subclusters. We manually inspected 50 representative images per subcluster, iteratively removing non-dermatology clusters over five rounds until only dermatology-related clusters remained.

### 1.3. Educational Material

**Collecting Image-text Pairs from Educational Material.** We curated image-text pairs from 68 materials using the Fitz optical scanning module from the PyMuPDF Python package. For each detected image, the nearest caption box containing figure-related patterns was automatically retrieved to form an image-text pair. When direct extraction from scanned PDFs was not feasible, Optical Character Recognition (OCR) converted them into a vectorized format before extraction.

**Removing Non-Dermatology Images.** To remove non-dermatology images from curated image-text pairs, we partitioned the curated image-text pairs into 20,000 image chunks for computational efficiency. EfficientNetV2-S served as a feature extractor, encoding image features that were subsequently reduced to a 50-dimensional space using Principal Component Analysis (PCA). Manual inspection and iterative non-dermatology cluster removal were performed three times to ensure the elimination of the most irrelevant images.

**Subfigure Detection and Segmentation.** For subfigure detection, we trained a DINO [12] object detector using the MMDetection framework on 1,072 training images and 213 validation images sampled for each data source. The trained model then detected all subfigures, systematically cropping and arranging them in a structured left-to-right, top-to-bottom order.

**Subcaption Detection and Image-text Pairing.** Subcaptions were extracted using regular expressions that identified common subfigure markers (e.g., A) and (a)), facilitating automated detection and segmentation. Each subfigure was matched sequentially with its corresponding subcaption. If discrepancies arose between the number of subfigures and subcaptions, the original images and captions remained intact to preserve data integrity.

**Automated Filtering of Non-Dermatology Subfigures.** To further remove non-dermatology subfigures, we trained a DenseNet-121 classifier on a manually annotated dataset of 2,200 images sourced from educational materials (2,000 dermatology, 200 non-dermatology). Using a weighted random sampler and the Adam optimizer, we trained with a batch size of 128 and a learning rate of  $9e-3$ . Early stopping

was applied, halting training if validation AUROC showed no improvement after 22 epochs. By applying this classifier, we effectively excluded non-dermatology images from our dataset, ultimately ensuring a high-quality collection of image-text pairs sourced from educational materials.

### 1.4. Medical Forums

**Extracting Image-Text Pairs from Twitter Posts.** We began by manually reviewing content associated with 58 dermatology-related keywords to identify highly relevant channels. Through this process, we curated 27 dermatology channels comprising 14,099 posts, including both the tweet content and the three most-liked replies under each tweet. To ensure the dataset contained high-quality dermatology images, we applied the classifier mentioned in the educational materials-curated pipeline, refining the dataset to 6,726 images.

**Text Cleaning and Processing.** The accompanying text underwent extensive cleaning, removing @usernames, hashtags (#), newline (\n) and carriage return (\r) symbols, HTML links, URLs, bold and italicized text, and other invalid characters. Additionally, all sentences containing question marks or beginning with “What is” were eliminated to enhance textual clarity.

**Manual Removal of Advertisements.** Further refinement was carried out through manual inspection, leading to the removal of advertisement-related tweets, reducing the dataset to 6,532 image-text pairs.

**Text Standardization.** To standardize the text, we reconstructed it by concatenating the original tweet content with its longest reply. Finally, image-text pairs containing fewer than three words were discarded, resulting in a final dataset of 6,431 high-quality image-text pairs. For other medical forums such as IYYI and Reddit, we followed similar workflows.

### 1.5. Public Dataset

Additionally, we created handcrafted image-text pairs using the publicly available SCIN [9] and MSKCC [1] datasets. For the MSKCC dataset, we generated text descriptions by integrating anatomic site, lesion type, and diagnosis results into a structured template, yielding 10,619 image-text pairs. Similarly, for the SCIN dataset, we constructed text descriptions by incorporating image modality, skin tone, age, gender, skin texture, symptoms, and diagnosis into a handcrafted template, resulting in 6,518 image-text pairs.

### 1.6. Initial Text Processing and Quality Control

**General Processing.** As shown in Fig. 4, we processed non-forum text through language detection, information block filtering, and abbreviation expansion. Non-English text was identified using SpaCy and translated into English using GPT. For data sourced from PubMed and educational

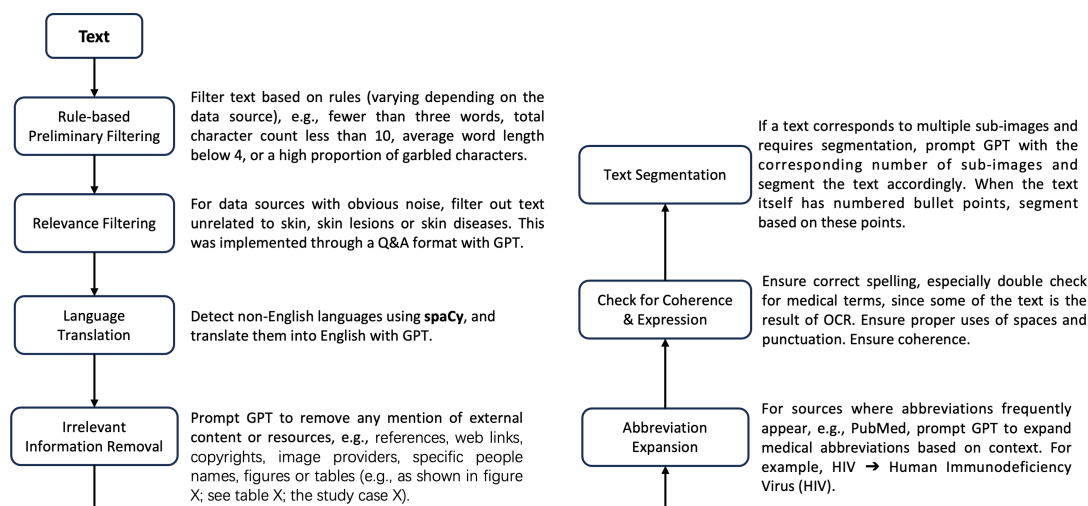

Figure 4. Workflow for general text processing.

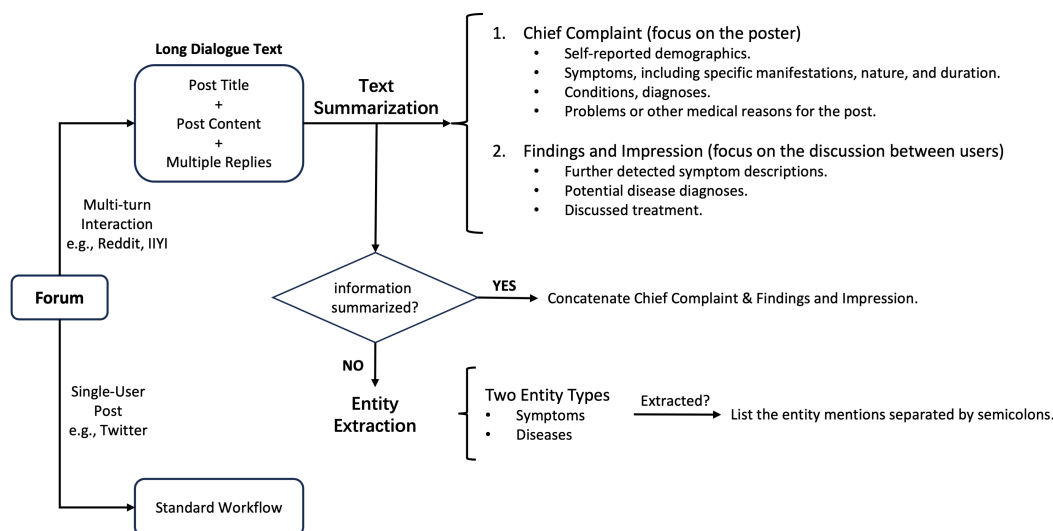

Figure 5. Workflow for forum-specific text processing.

materials, we instructed GPT to filter out non-medical information blocks, such as citations, figure references, hyperlinks, copyright statements, and personal names. For knowledge-dense texts, GPT recognized and expanded abbreviations contextually (e.g., HIV → Human Immunodeficiency Virus (HIV)).

**Forum-Specific Processing.** As illustrated in Fig. 5, for multi-turn discussions in medical forums, we extracted structured summaries, including: (1) the poster’s chief complaint (demographics, symptoms, diagnosis, and medical intent) and (2) clinical findings and impressions from replies (symptom elaborations, differential diagnostic discussions, and treatment suggestions). These components

were concatenated to form the final captions. If summarization failed, we instead extracted symptom and disease entities, connecting them with semicolons.

**Quality Control.** We applied rule-based filtering specific to data sources, including but not limited to discarding captions with fewer than three words or ten characters, as well as those consisting solely of garbled text. For noisy sources, we instructed GPT to evaluate dermatological relevance using a QA-based approach. OCR-derived text underwent spell-checking, punctuation correction, and coherence refinement. This ensured captions were precise, standardized, and dermatology-focused.

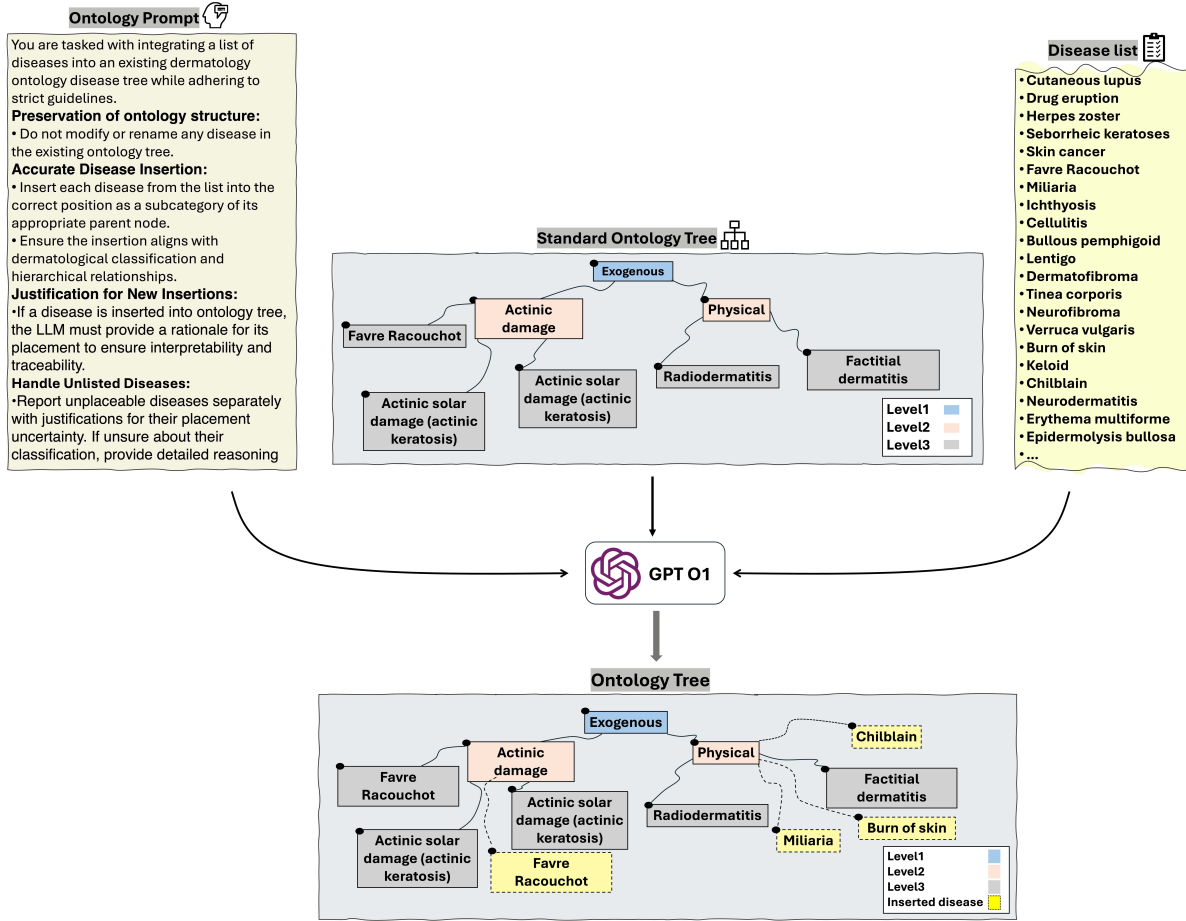

Figure 6. **Example of ontology tree construction.** A pipeline for developing a comprehensive ontology tree from a standard expert-constructed ontology tree. The LLM is provided with the standard ontology tree pre-defined by medical experts, the ontology prompt, and the standardized disease list, ensuring the original ontology structure is maintained while accurately inserting diseases into the correct hierarchical positions.

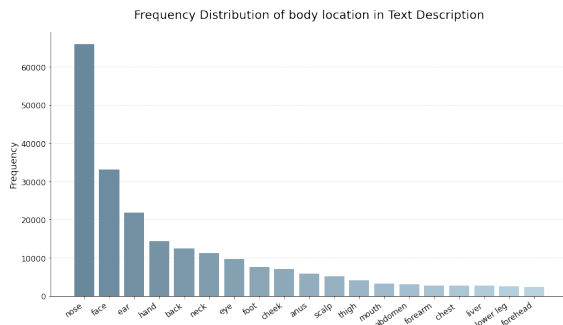

Figure 7. Frequency distribution of body sites.

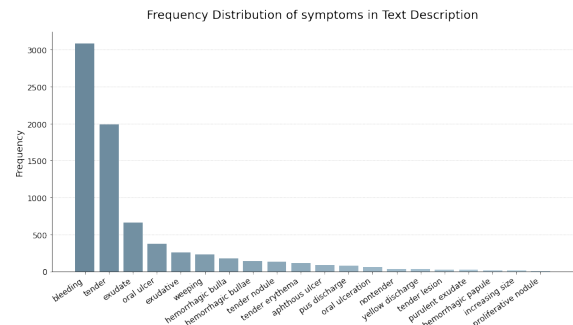

Figure 8. Frequency distribution of symptoms.

## 1.7. Ontology Knowledge Augmentation

### 1.7.1. Standardized Disease and Clinical Concept

For all data sources, the LLM-extracted content was often noisy and unformatted. We standardized diseases and con-

cepts to avoid medical term ambiguity issues.

**Construction of the Standardized Disease List.** We constructed a standardized disease list by compiling disease labels from the F17k, SD128, SNU134, SCIN, and HAM





velopment remained systematic, transparent, and aligned with expert-defined standards, while effectively leveraging the LLM’s capabilities for hierarchical reasoning and disease classification.

**Ontology Caption Construction.** Once the standardized disease list was integrated, we used the augmented ontology tree to retrieve all parent nodes of each disease, generating hierarchical disease paths (e.g., folliculitis: inflammatory → infectious → bacterial → folliculitis). We then transformed the hierarchy into ontology-augmented captions using a series of predefined templates, such as ‘This is a skin photo diagnosed as {inflammatory, infectious, bacterial, folliculitis}.’ This approach ensured that ontology captions accurately represented hierarchical relationships within the ontology tree, providing a structured and standardized description of dermatological conditions.

**Knowledge Augmentation Caption Construction.** Finally, the knowledge-augmented caption was constructed by appending the ontology caption and clinical concept caption to the end of the original caption. Similar to ontology caption construction, the clinical concept captions were generated using a handcrafted template: “This is a skin photo showing {concept\_a, concept\_b, concept\_c}.”

## 2. Additional Dataset Statistics

Fig. 7 and 8 illustrate the frequency distribution of anatomical locations and symptoms in Derm1M. The analysis reveals that skin conditions predominantly manifest on the face, nose, and ears, while common symptoms include bleeding and tenderness. These distributions offer valuable insights into prevalence patterns within the dataset. Additionally, Fig. 9 displays word clouds highlighting frequent terms across three categories: medical terminology, dermatological conditions, and clinical concepts. Fig. ??-?? showcase representative image-text pairs from the Derm1M dataset. Table 5 and 6 show the complete list of the 390 skin conditions and 130 clinical concepts covered in Derm1M.

## 3. Downstream Dataset Details

**Daffodil:** This dataset is distinguished by its comprehensive collection of 9,548 dermoscopic images across five skin conditions (acne, vitiligo, hyperpigmentation, nail psoriasis, and SJS-TEN), offering a valuable resource for non-melanoma skin disease classification that complements existing skin cancer-focused datasets like ISIC2019 [1] and HAM10000 [8].

## 4. Additional Ablation Studies

We explore the performance differences between training methods on the Derm1M dataset, comparing SigLIP [11], CoCa [10], and CLIP [5]. Tables 1–3 present downstream performance across various tasks. CLIP consistently

outperforms on zero-shot disease classification and few-shot/full-shot linear evaluation, achieving the highest accuracy in most settings. However, SigLIP and CoCa demonstrate superior performance on cross-modal retrieval tasks.

## 5. Additional Implementation Details

**Training Details.** We pretrain a series of models called DermLIP on the Derm1M dataset following CLIP [5]’s contrastive learning objective. Each model is trained for 30 epochs on a single NVIDIA H200 GPU. We swap hyperparameters including batch size and learning rate, selecting the best-performing models based on validation loss.

**Prompt Details for Zero-shot Classification** We adhere to the zero-shot classification method of the OpenCLIP framework, utilizing a prompt ensemble strategy for evaluation. The specific prompt templates employed in this process are detailed in Table 7.

**Hyper-parameter tables for main models** We present the pre-training hyper-parameters for the DermLIP models in Table 8. The table includes all critical training hyper-parameters, while the remaining parameters adhere to the default settings of the OpenCLIP framework.

| Training methods | Pretrained Data | Vision Enc. | Text Enc. | HAM           | F17K          | PAD           | Daffodil      | Average       |
|------------------|-----------------|-------------|-----------|---------------|---------------|---------------|---------------|---------------|
| #class           |                 |             |           | 7             | 113           | 6             | 5             |               |
| SigLIP           | Derm1M          | ViT-B16     | SigLIP    | 0.6068        | 0.2249        | 0.5857        | 0.7058        | 0.5308        |
| CoCa             | Derm1M          | ViT-B32     | GPT77     | 0.4098        | 0.1700        | 0.5466        | <b>0.7262</b> | 0.4632        |
| CLIP             | Derm1M          | ViT-B16     | GPT77     | <b>0.6820</b> | <b>0.2278</b> | <b>0.6074</b> | 0.7257        | <b>0.5607</b> |

Table 1. Ablation on different training methods for zero-shot disease classification (Acc).

| Labeling Ratio | Methods | Vision Enc. | Text Enc. | HAM           | F17K          | PAD           | Daffodil      | Average       |
|----------------|---------|-------------|-----------|---------------|---------------|---------------|---------------|---------------|
| #class         |         |             |           | 7             | 113           | 6             | 5             |               |
| 1%             | SigLIP  | ViT-B16     | SigLIP    | 0.6986        | 0.1394        | 0.5098        | 0.7476        | 0.5239        |
|                | CoCa    | ViT-B32     | GPT77     | 0.7212        | 0.1349        | 0.5076        | 0.7974        | 0.5403        |
|                | CLIP    | ViT-B16     | GPT77     | <b>0.7458</b> | <b>0.1602</b> | <b>0.5184</b> | <b>0.8545</b> | <b>0.5697</b> |
| 10%            | SigLIP  | ViT-B16     | SigLIP    | 0.8037        | 0.2980        | 0.6312        | 0.8759        | 0.6522        |
|                | CoCa    | ViT-B32     | GPT77     | 0.7532        | 0.2967        | 0.6551        | 0.8681        | 0.6433        |
|                | CLIP    | ViT-B16     | GPT77     | <b>0.8110</b> | <b>0.3555</b> | <b>0.6594</b> | <b>0.9372</b> | <b>0.6908</b> |
| 100%           | SigLIP  | ViT-B16     | SigLIP    | <b>0.8550</b> | 0.4433        | 0.6703        | 0.9330        | 0.7254        |
|                | CoCa    | ViT-B32     | GPT77     | 0.7591        | 0.4933        | 0.7115        | 0.8743        | 0.7096        |
|                | CLIP    | ViT-B16     | GPT77     | 0.8523        | <b>0.5102</b> | <b>0.7614</b> | <b>0.9644</b> | <b>0.7720</b> |

Table 2. Ablation on different training methods for linear evaluation (Acc).

| Training methods | Vision Enc. | Text Enc. | Holdout (n=9806) |               |               |               | SkinCAP (n=3989) |               |               |               |
|------------------|-------------|-----------|------------------|---------------|---------------|---------------|------------------|---------------|---------------|---------------|
|                  |             |           | I2T (%)          |               | T2I (%)       |               | I2T (%)          |               | T2I (%)       |               |
|                  |             |           | R@10             | R@50          | R@10          | R@50          | R@10             | R@50          | R@10          | R@50          |
| SigLIP           | ViT-b16     | SigLIP    | 0.3763           | 0.5614        | 0.3818        | 0.5716        | <b>0.1860</b>    | <b>0.3896</b> | <b>0.1908</b> | <b>0.4141</b> |
| CoCa             | ViT-B32     | GPT77     | <b>0.4150</b>    | <b>0.6102</b> | <b>0.4182</b> | <b>0.6116</b> | 0.1564           | 0.3643        | 0.1737        | 0.3818        |
| CLIP             | ViT-b16     | GPT77     | 0.4069           | 0.6021        | 0.3966        | 0.5992        | 0.1567           | 0.3632        | 0.1594        | 0.3567        |

Table 3. Ablation on different training methods for cross-modal retrieval results. I2T represents image-to-text retrieval and T2I represents text-to-image retrieval.

| Method          | Encoder   |        | AUROC         |               |               |
|-----------------|-----------|--------|---------------|---------------|---------------|
|                 | Vision    | Text   | SkinCon (32)  | Derm7pt (7)   | Average       |
| CLIP-B16 [5]    | ViT-B16   | GPT77  | 0.6643        | 0.5594        | 0.6119        |
| SigLIP [11]     | ViT-B16   | SigLIP | 0.6769        | 0.5631        | 0.6200        |
| CoCa [10]       | ViT-B32   | GPT77  | 0.6041        | 0.5677        | 0.5859        |
| PMC-CLIP [4]    | ResNet50  | GPT77  | 0.6251        | 0.5820        | 0.6036        |
| BiomedCLIP [13] | ViT-B16   | PMB256 | 0.6817        | 0.6092        | 0.6455        |
| MONET [3]       | ViT-L14   | GPT77  | 0.7502        | <b>0.6889</b> | 0.7196        |
| DermLIP         | ViT-B16   | GPT77  | <b>0.7728</b> | 0.6877        | <b>0.7303</b> |
| DermLIP         | PanDerm-B | PMB256 | 0.7299        | 0.6148        | 0.6724        |

Table 4. Zero-shot concept annotation (AUROC).



| A-E                                                                                                                                                                                                                                                                                                                                                                                                                                                                                                                            | F-M                                                                                                                                                                                                                                                                                                                                                                                                    | N-R                                                                                                                                                                                                                                                                                                                                                                                                                  | S-Z                                                                                                                                                                                                                                                                                                                                                                                                                                                                |
|--------------------------------------------------------------------------------------------------------------------------------------------------------------------------------------------------------------------------------------------------------------------------------------------------------------------------------------------------------------------------------------------------------------------------------------------------------------------------------------------------------------------------------|--------------------------------------------------------------------------------------------------------------------------------------------------------------------------------------------------------------------------------------------------------------------------------------------------------------------------------------------------------------------------------------------------------|----------------------------------------------------------------------------------------------------------------------------------------------------------------------------------------------------------------------------------------------------------------------------------------------------------------------------------------------------------------------------------------------------------------------|--------------------------------------------------------------------------------------------------------------------------------------------------------------------------------------------------------------------------------------------------------------------------------------------------------------------------------------------------------------------------------------------------------------------------------------------------------------------|
| abscess<br>acuminate<br>angulated<br>annular<br>arciform arrangement<br>arcuate<br>asymmetric<br>atrophy<br>black<br>blue<br>blue whitish veil<br>blurred<br>brown(hyperpigmentation)<br>bulla<br>burrow<br>circumscribed<br>clustered<br>comedo<br>confluent<br>crust<br>crusted<br>cyst<br>dermatomal<br>desquamation<br>diffuse<br>discrete<br>disseminated<br>dome-shaped<br>dots and globules<br>dyschromic<br>ecchymotic<br>eczematous<br>eroded<br>erosion<br>erythema<br>excoriation<br>exophytic/fungating<br>exudate | fissure<br>fissured<br>flat<br>flat topped<br>follicular-centered<br>friable<br>generalized<br>geometric<br>gray<br>grouped<br>hemorrhage<br>herpetiform<br>hyperkeratotic<br>induration<br>irregular<br>keloid<br>keratotic<br>comedo<br>leaf-shaped<br>lichenification<br>lichenoid<br>linear<br>linear arrangement<br>localized<br>macule<br>maculopapule<br>maculopatch<br>melanotic<br>molluscoid | necrosis<br>nodule<br>orange<br>oval<br>papule<br>papulonodule<br>papulopustule<br>papulovesicle<br>patch<br>pedunculated<br>perifollicular<br>pigment network<br>pigmentation<br>pink<br>plaque<br>poikiloderma<br>polygonal<br>poorly defined<br>psoriasiform<br>purple<br>purpura/petechiae<br>pustule<br>raised<br>red<br>regression structures<br>regular<br>reticular<br>reticulated pattern<br>rough<br>round | salmon<br>satellite<br>scale<br>scaly<br>scar<br>scattered<br>sclerosis<br>serpiginous<br>sharp<br>smooth<br>stellate<br>streaks<br>symmetric<br>targetoid<br>telangiectasia<br>translucent<br>tumor<br>ulcer<br>ulcerated<br>umbilicated<br>vascular structures<br>vegetating<br>verrucous<br>vesicle<br>violaceous<br>wart/papillomatous<br>wedge-shaped<br>well-defined<br>wheal<br>white(hypopigmentation)<br>xanthomatous<br>xerosis<br>yellow<br>zosteriform |

Table 5. Full List of 130 standardized clinical concepts.

| A-E                                                   | F-M                                                                        |
|-------------------------------------------------------|----------------------------------------------------------------------------|
| abscess                                               | factitial dermatitis                                                       |
| acanthosis nigricans                                  | favre racouchot                                                            |
| acne                                                  | fibroma molle                                                              |
| acne keloidalis nuchae                                | fixed drug eruption                                                        |
| acne urticata                                         | fixed eruptions                                                            |
| acne vulgaris                                         | flat wart                                                                  |
| acquired autoimmune bullous diseaseherpes gestationis | flushing                                                                   |
| acrokeratosis verruciformis                           | follicular mucinosis                                                       |
| actinic granuloma                                     | folliculitis                                                               |
| actinic solar damage(actinic keratosis)               | foot ulcer                                                                 |
| actinic solar damage(cutis rhomboidalis nuchae)       | foreign body reaction of the skin                                          |
| actinic solar damage(pigmentation)                    | fox-fordyce disease                                                        |
| actinic solar damage(solar elastosis)                 | freckle                                                                    |
| actinic solar damage(solar purpura)                   | fungal dermatitis                                                          |
| actinic solar damage(telangiectasia)                  | fungal dermatosis                                                          |
| acute and chronic dermatitis                          | furuncle                                                                   |
| acute constitutional eczema                           | geographic tongue                                                          |
| acute dermatitis                                      | granulation tissue                                                         |
| acute dermatitis, nos                                 | granuloma annulare                                                         |
| acute generalized exanthematous pustulosis            | granuloma faciale                                                          |
| acute vesicular dermatitis                            | grover's disease                                                           |
| adnexal neoplasm                                      | guttate psoriasis                                                          |
| ageing skin                                           | hailey hailey disease                                                      |
| allergic contact dermatitis                           | halo nevus                                                                 |
| allergic reaction                                     | hand eczema                                                                |
| alopecia                                              | hand foot and mouth disease                                                |
| alopecia areata                                       | hemangioma                                                                 |
| alopecia mucinosa                                     | hematoma of skin                                                           |
| amyloidosis                                           | hemosiderin pigmentation of lower limb due to varicose veins of lower limb |
| angiofibroma                                          | hemosiderin pigmentation of skin due to venous insufficiency               |
| angiokeratoma                                         | herpes simplex virus                                                       |
| angioma                                               | herpes zoster                                                              |
| angular cheilitis                                     | hidradenitis suppurativa                                                   |
| animal bite - wound                                   | histiocytosis of skin                                                      |
| annular erythema                                      | hormonal acne                                                              |
| apocrine hydrocystoma                                 | hyperkeratosis palmaris et plantaris                                       |
| arsenical keratosis                                   | hyperpigmentation                                                          |
| atopic dermatitis                                     | hypersensitivity                                                           |
| atopic winter feet                                    | hypertrichosis                                                             |
| autoimmune dermatitis                                 | hypertrophic scar                                                          |
| basal cell carcinoma                                  | ichthyosis                                                                 |
| beau's lines                                          | idiopathic guttate hypomelanosis                                           |
| becker nevus                                          | impetigo                                                                   |
| behcets disease                                       | infantile atopic dermatitis                                                |
| benign keratosis                                      | infected eczema                                                            |
| blister                                               | inflammatory dermatosis                                                    |
| blue nevus                                            | insect bite                                                                |
| bowen's disease                                       | intertrigo                                                                 |
| bullous disease                                       | inverse psoriasis                                                          |
| bullous pemphigoid                                    | irritant contact dermatitis                                                |
| burn of forearm                                       | irritated seborrheic keratosis (from "sk/isk")                             |
| burn of skin                                          | junction nevus                                                             |
| café au lait macule                                   | juvenile plantar dermatosis                                                |
| calcinosis cutis                                      | juvenile xanthogranuloma                                                   |
| callus                                                | kaposi sarcoma                                                             |
| campbell de morgan spots                              | kaposi's sarcoma of skin                                                   |
| candida intertrigo                                    | keloid                                                                     |
| candidiasis                                           | keratoacanthoma                                                            |
| cellulitis                                            | keratoderma                                                                |
| central centrifugal cicatricial alopecia              | keratolysis exfoliativa of wende                                           |
| cheilitis                                             | keratosis                                                                  |
| chilblain                                             | keratosis pilaris                                                          |
| childhood bullous pemphigoid                          | keratosis pilaris rubra faciei                                             |
| cholestasis of pregnancy                              | kerion                                                                     |
| chondrodermatitis nodularis helices                   | knuckle pads                                                               |

|                                                                                                                                                                                                                                                                                                                                                                                                                                                                                                                                                                                                                                                                                                                                                                                                                                                                                                                                                                                                                                                                                                                                                                                                                                                                                                                                                                                                                                                                                                                                                                                              |                                                                                                                                                                                                                                                                                                                                                                                                                                                                                                                                                                                                                                                                                                                                                                                                                                                                                                                                                                               |
|----------------------------------------------------------------------------------------------------------------------------------------------------------------------------------------------------------------------------------------------------------------------------------------------------------------------------------------------------------------------------------------------------------------------------------------------------------------------------------------------------------------------------------------------------------------------------------------------------------------------------------------------------------------------------------------------------------------------------------------------------------------------------------------------------------------------------------------------------------------------------------------------------------------------------------------------------------------------------------------------------------------------------------------------------------------------------------------------------------------------------------------------------------------------------------------------------------------------------------------------------------------------------------------------------------------------------------------------------------------------------------------------------------------------------------------------------------------------------------------------------------------------------------------------------------------------------------------------|-------------------------------------------------------------------------------------------------------------------------------------------------------------------------------------------------------------------------------------------------------------------------------------------------------------------------------------------------------------------------------------------------------------------------------------------------------------------------------------------------------------------------------------------------------------------------------------------------------------------------------------------------------------------------------------------------------------------------------------------------------------------------------------------------------------------------------------------------------------------------------------------------------------------------------------------------------------------------------|
| chronic actinic dermatitis<br>chronic dermatitis, nos<br>clubbing of fingers<br>compound nevus<br>condyloma<br>condyloma acuminatum<br>confluent and reticulated papillomatosis<br>congenital nevus<br>contact dermatitis<br>contact dermatitis caused by rhus diversiloba<br>contact dermatitis, nos<br>contact purpura<br>crowe's sign<br>cutaneous b-cell lymphoma<br>cutaneous horn<br>cutaneous larva migrans<br>cutaneous leishmaniasis<br>cutaneous lupus<br>cutaneous sarcoidosis<br>cutaneous t cell lymphoma<br>cyst<br>darier-white disease<br>daries disease<br>deep fungal infection<br>degos disease<br>dermatitis<br>dermatitis herpetiformis<br>dermatofibroma<br>dermatosis papulosa nigra<br>desquamation<br>diffuse xanthoma<br>digital fibroma<br>dilated pore of winer<br>discoid eczema<br>disseminated actinic porokeratosis<br>drug eruption<br>drug eruptions & reactions<br>drug-induced pigmentary changes<br>dry skin<br>dyshidrosiform eczema<br>dysplastic nevus<br>ecthyma<br>ecthyma gangrenosum<br>eczema<br>eczema herpeticum<br>ehlers danlos syndrome<br>elephantiasis nostras<br>epidermal nevus<br>epidermoid cyst<br>epidermolysis bullosa<br>erosion of skin<br>erosive pustular dermatosis of the scalp<br>eruptive odontogenic cyst<br>eruptive xanthoma<br>erythema ab igne<br>erythema annulare centrifugum<br>erythema craquele<br>erythema dyschromicum perstans<br>erythema elevatum diutinum<br>erythema gyratum repens<br>erythema migrans<br>erythema multiforme<br>erythema nodosum<br>exfoliative dermatitis<br>exfoliative erythroderma | koilonychia<br>langerhans cell histiocytosis<br>leg veins<br>lentigo<br>lentigo maligna<br>lentigo maligna melanoma<br>leukocytoclastic vasculitis<br>leukonychia<br>lichen amyloidosis<br>lichen nitidus<br>lichen planus<br>lichen sclerosis et atrophicus<br>lichen simplex chronicus<br>lichen spinulosus<br>lichen striatus<br>lipoma<br>livedo reticularis<br>local infection of wound<br>localized cutaneous vasculitis<br>localized skin infection<br>lupus erythematosus<br>lyme disease<br>lymphangioma<br>lymphocytic infiltrate of jessner<br>majocchi granuloma<br>median nail dystrophy<br>medication-induced cutaneous pigmentation<br>melanin pigmentation due to exogenous substance<br>melanocytic nevus<br>melanoma<br>melasma<br>merkel cell carcinoma<br>metastatic carcinoma<br>milia<br>miliaria<br>moles<br>molluscum contagiosum<br>morphea<br>mucinosis<br>mucoccele<br>mucosal melanotic macule<br>muzzle rash<br>mycosis fungoides<br>myxoid cyst |
| <b>N-R</b>                                                                                                                                                                                                                                                                                                                                                                                                                                                                                                                                                                                                                                                                                                                                                                                                                                                                                                                                                                                                                                                                                                                                                                                                                                                                                                                                                                                                                                                                                                                                                                                   | <b>S-Z</b>                                                                                                                                                                                                                                                                                                                                                                                                                                                                                                                                                                                                                                                                                                                                                                                                                                                                                                                                                                    |
| naevus comedonicus                                                                                                                                                                                                                                                                                                                                                                                                                                                                                                                                                                                                                                                                                                                                                                                                                                                                                                                                                                                                                                                                                                                                                                                                                                                                                                                                                                                                                                                                                                                                                                           | sand-worm eruption                                                                                                                                                                                                                                                                                                                                                                                                                                                                                                                                                                                                                                                                                                                                                                                                                                                                                                                                                            |

nail disease  
nail dystrophy  
nail psoriasis  
necrobiosis lipoidica  
nematode infection  
neurodermatitis  
neurofibroma  
neurofibromatosis  
neutrophilic dermatoses  
nevus  
nevus depigmentosus  
nevus sebaceous of jadassohn  
nevus spilus  
no definitive diagnosis  
nummular eczema  
onycholysis  
onychomycosis  
onychoschizia  
organoid nevus  
ota nevus  
others  
palmoplantar pustulosis  
palpable migrating erythema  
papular dermatoses of pregnancy  
parapsoriasis  
paronychia  
parvovirus b19 infection  
pemphigus vulgaris  
phototherapy  
phytophotodermatitis  
pigmentation of pregnancy  
pigmented progressive purpuric dermatosis  
pigmented purpuric eruption  
pilar cyst  
pincer nail deformity  
pityriasis alba  
pityriasis lichenoides  
pityriasis lichenoides chronica  
pityriasis lichenoides et varioliformis acuta  
pityriasis rosea  
pityriasis rubra pilaris  
pityrosporum folliculitis  
poikiloderma  
poikiloderma of civatte  
poisoning by nematocyst  
polymorphic eruption of pregnancy  
polymorphous light eruption  
porokeratosis  
porokeratosis of mibelli  
poroma  
porphyria  
port wine stain  
post-inflammatory hyperpigmentation  
post-inflammatory hypopigmentation  
post-inflammatory pigmentation  
pressure ulcer  
prurigo  
prurigo gravidarum  
prurigo nodularis  
prurigo of pregnancy  
prurigo pigmentosa  
pruritic urticarial papules and plaques of pregnancy  
pruritus ani  
pseudo-glucagonoma syndrome  
pseudofolliculitis barbae  
pseudorhinophyma  
psoriasis

sarcoidosis  
scabies  
scalp psoriasis  
scar  
scleroderma  
scleromyxedema  
sebaceous hyperplasia  
seborrheic keratoses  
sixth disease  
skin and soft tissue atypical mycobacterial infection  
skin cancer  
skin diseases caused by warts  
skin infection  
skin lesion in drug addict  
skin tag  
spider veins  
squamous cell carcinoma  
staphylococcal scalded skin syndrome  
stasis dermatitis  
stasis edema  
stasis ulcer  
steatocystoma multiplex  
steroid acne  
steroid use abuse/misuse dermatitis  
stevens-johnson syndrome  
strawberry birthmarks  
striae  
subungual hematoma  
sun spots  
sunburn  
superficial gyrate erythema  
superficial spreading melanoma ssm  
superficial wound of body region  
sweet syndrome  
sweet's syndrome  
syphilis  
syringoma  
systemic disease  
telangiectasia macularis eruptiva perstans  
tick bite  
tinea  
tinea corporis  
tinea cruris  
tinea manus  
tinea pedis  
tinea versicolor  
transient acantholytic dermatosis  
traumatic blister  
traumatic ulcer  
tuberous sclerosis  
tungiasis  
ulcer  
unilateral laterothoracic exanthem  
urticaria  
urticaria pigmentosa  
urticarial vasculitis  
varicella  
varicose veins of lower extremity  
vascular  
vasculitis  
venous lake  
verruca vulgaris  
viral exanthem  
viral exanthems: roseola  
vitiligo  
wound/abrasion  
xanthelasma

|                                                                                                                                                                                                                                         |                                                    |
|-----------------------------------------------------------------------------------------------------------------------------------------------------------------------------------------------------------------------------------------|----------------------------------------------------|
| pustular psoriasis<br>pyoderma<br>pyoderma gangrenosum<br>pyogenic granuloma<br>radiodermatitis<br>raynaud phenomenon<br>red stretch marks<br>relapsing polychondritis<br>rheumatoid nodule<br>rhinophyma<br>riehl melanosis<br>rosacea | xeroderma pigmentosum<br>xerosis<br>xerotic eczema |
|-----------------------------------------------------------------------------------------------------------------------------------------------------------------------------------------------------------------------------------------|----------------------------------------------------|

Table 6. Full list of 390 standardized skin conditions.

| ID | Template                                                 |
|----|----------------------------------------------------------|
| 1  | This is a skin image of {CLASS_LABEL}.                   |
| 2  | This is a skin image of {CLASS_LABEL}.                   |
| 3  | A skin image of {CLASS_LABEL}.                           |
| 4  | An image of {CLASS_LABEL}, a skin condition.             |
| 5  | {CLASS_LABEL}, a skin disorder, is shown in this image.  |
| 6  | The skin lesion depicted is {CLASS_LABEL}.               |
| 7  | The skin cancer in this image is {CLASS_LABEL}.          |
| 8  | This image depicts {CLASS_LABEL}, a type of skin cancer. |

Table 7. Prompt templates for zero-shot classification.

| Hyper-parameters | ViT-B16 + GPT77 | PanDerm-B + PMB256 | ViT-B16 + SigLIP | ViT-B32 + GPT77   |
|------------------|-----------------|--------------------|------------------|-------------------|
| warmup           | 1000            | 1000               | 1000             | 1000              |
| weight decay     | 0.1             | 0.1                | 0.1              | 0.1               |
| LR Scheduler     | cosine          | cosine             | cosine           | cosine            |
| batch size       | 4096            | 2048               | 2048             | 512               |
| learning rate    | 1e-4            | 1e-4               | 1e-4             | 1e-4              |
| epochs           | 30              | 30                 | 30               | 30                |
| Pretrain         | openai          | PanDerm            | webli            | laion2b_s13b_b90k |
| Vision Encoder   | ViT-B16         | PanDerm-B          | ViT-B16          | ViT-B32           |
| Text Encoder     | GPT77           | PMB256             | SigLIP           | GPT77             |

Table 8. Hyperparameters for DermLIP models pretraining.



## References

- [1] Noel CF Codella, David Gutman, M Emre Celebi, Brian Helba, Michael A Marchetti, Stephen W Dusza, Aadi Kalloo, Konstantinos Liopyris, Nabin Mishra, Harald Kittler, et al. Skin lesion analysis toward melanoma detection: A challenge at the 2017 international symposium on biomedical imaging (isbi), hosted by the international skin imaging collaboration (isic). In *2018 IEEE 15th international symposium on biomedical imaging (ISBI 2018)*, pages 168–172. IEEE, 2018. [3](#), [7](#)
- [2] Wisdom Ikezogwo, Saygin Seyfioglu, Fatemeh Ghezloo, Dylan Geva, Fatwir Sheikh Mohammed, Pavan Kumar Anand, Ranjay Krishna, and Linda Shapiro. Quilt-1m: One million image-text pairs for histopathology. *Advances in neural information processing systems*, 36, 2024. [1](#)
- [3] Chanwoo Kim, Soham U Gadgil, Alex J DeGrave, Jesutofunmi A Omiye, Zhuo Ran Cai, Roxana Daneshjou, and Su-In Lee. Transparent medical image ai via an image–text foundation model grounded in medical literature. *Nature Medicine*, pages 1–12, 2024. [2](#), [8](#)
- [4] Weixiong Lin, Ziheng Zhao, Xiaoman Zhang, Chaoyi Wu, Ya Zhang, Yanfeng Wang, and Weidi Xie. Pmc-clip: Contrastive language-image pre-training using biomedical documents. In *International Conference on Medical Image Computing and Computer-Assisted Intervention*, pages 525–536. Springer, 2023. [2](#), [8](#)
- [5] Alec Radford, Jong Wook Kim, Chris Hallacy, and et al. Learning transferable visual models from natural language supervision. In *International conference on machine learning*, pages 8748–8763. PMLR, 2021. [7](#), [8](#)
- [6] Alec Radford, Jong Wook Kim, Tao Xu, Greg Brockman, Christine McLeavey, and Ilya Sutskever. Robust speech recognition via large-scale weak supervision. In *International conference on machine learning*, pages 28492–28518. PMLR, 2023. [2](#)
- [7] Xiaoxiao Sun, Jufeng Yang, Ming Sun, and Kai Wang. A benchmark for automatic visual classification of clinical skin disease images. In *Computer Vision–ECCV 2016: 14th European Conference, Amsterdam, The Netherlands, October 11–14, 2016, Proceedings, Part VI 14*, pages 206–222. Springer, 2016. [6](#)
- [8] Philipp Tschandl, Cliff Rosendahl, and Harald Kittler. The ham10000 dataset, a large collection of multi-source dermatoscopic images of common pigmented skin lesions. *Scientific data*, 5(1):1–9, 2018. [7](#)
- [9] Abbi Ward, Jimmy Li, Julie Wang, and et al. Creating an empirical dermatology dataset through crowdsourcing with web search advertisements. *JAMA Network Open*, 7(11): e2446615–e2446615, 2024. [3](#)
- [10] Jiahui Yu, Zirui Wang, Vijay Vasudevan, Legg Yeung, Mojtaba Seyedhosseini, and Yonghui Wu. Coca: Contrastive captioners are image-text foundation models. *arXiv preprint arXiv:2205.01917*, 2022. [7](#), [8](#)
- [11] Xiaohua Zhai, Basil Mustafa, Alexander Kolesnikov, and Lucas Beyer. Sigmoid loss for language image pre-training. In *Proceedings of the IEEE/CVF international conference on computer vision*, pages 11975–11986, 2023. [7](#), [8](#)
- [12] Hao Zhang, Feng Li, Shilong Liu, Lei Zhang, Hang Su, Jun Zhu, Lionel M. Ni, and Heung-Yeung Shum. Dino: Detr with improved denoising anchor boxes for end-to-end object detection, 2022. [3](#)
- [13] Sheng Zhang, Yanbo Xu, Naoto Usuyama, Hanwen Xu, Jaspreet Bagga, Robert Tinn, Sam Preston, Rajesh Rao, Mu Wei, Naveen Valluri, et al. A multimodal biomedical foundation model trained from fifteen million image–text pairs. *NEJM AI*, 2(1):A10a2400640, 2025. [8](#)
